# Supplementary figures and images for: Remote Adipose Tissue-Derived Stromal Cells of Patients with Lung Adenocarcinoma Generate a Similar Malignant Microenvironment of the Lung Stromal Counterpart
Source: Hindawi journal article supplement (doi:10.1155/2023/1011063), 2023-01-24

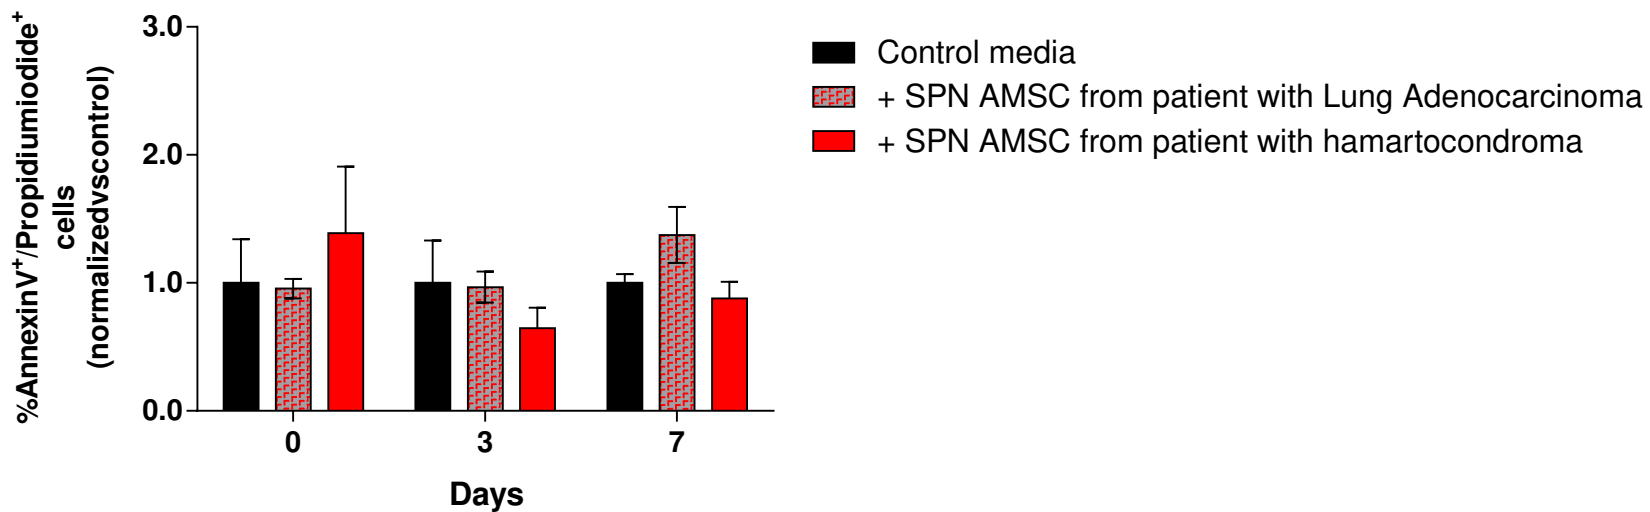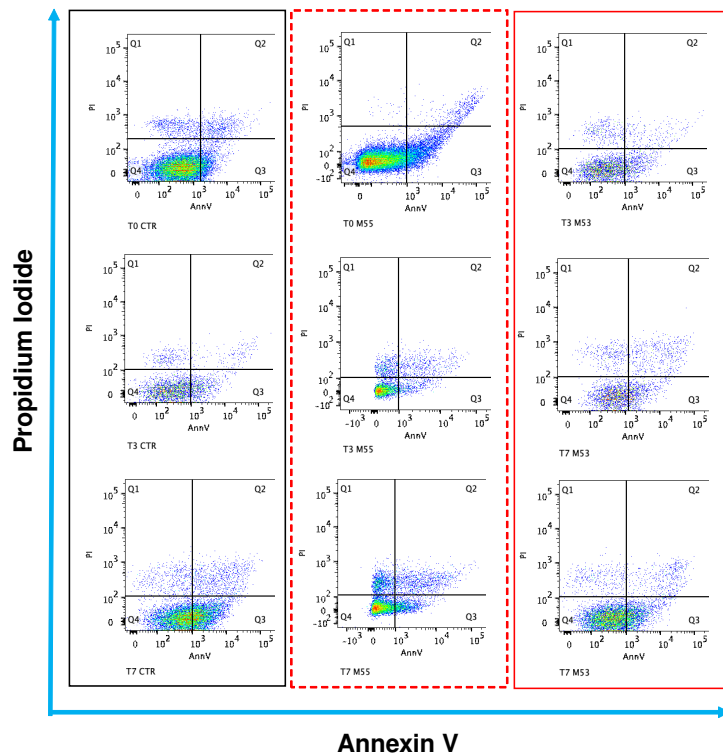

Supplement: f1 [file 1011063.f1.zip]
